# Supplementary material for: SHEAR Saliva Collection Device Augments Sample Properties for Improved Analytical Performance
Source: bioRxiv or medRxiv preprint supplement (doi:10.1101/2022.07.07.22277204), 2022-07-10
Supplement: Supplementary file [file media-1.pdf]

# Supplementary Materials for

## **SHEAR Saliva Collection Device Augments Sample Properties for Improved Analytical Performance**

Shang Wei Song, Rashi Gupta, Jothilingam Niharika, Xinlei Qian, Yue Gu, V Vien Lee, Yoann Sapanel, David Michael Allen, John Eu Li Wong, Paul A Macary\*, Dean Ho\*, Agata Blasiak\*

\*Corresponding author: Paul A Macary: [micpam@nus.edu.sg](mailto:micpam@nus.edu.sg) , Dean Ho: [biedh@nus.edu.sg](mailto:biedh@nus.edu.sg) , Agata Blasiak: [agata.blasiak@nus.edu.sg](mailto:agata.blasiak@nus.edu.sg)

### **This file includes:**

Figs. S1 to S4  
Tables S1

## Supplementary figures

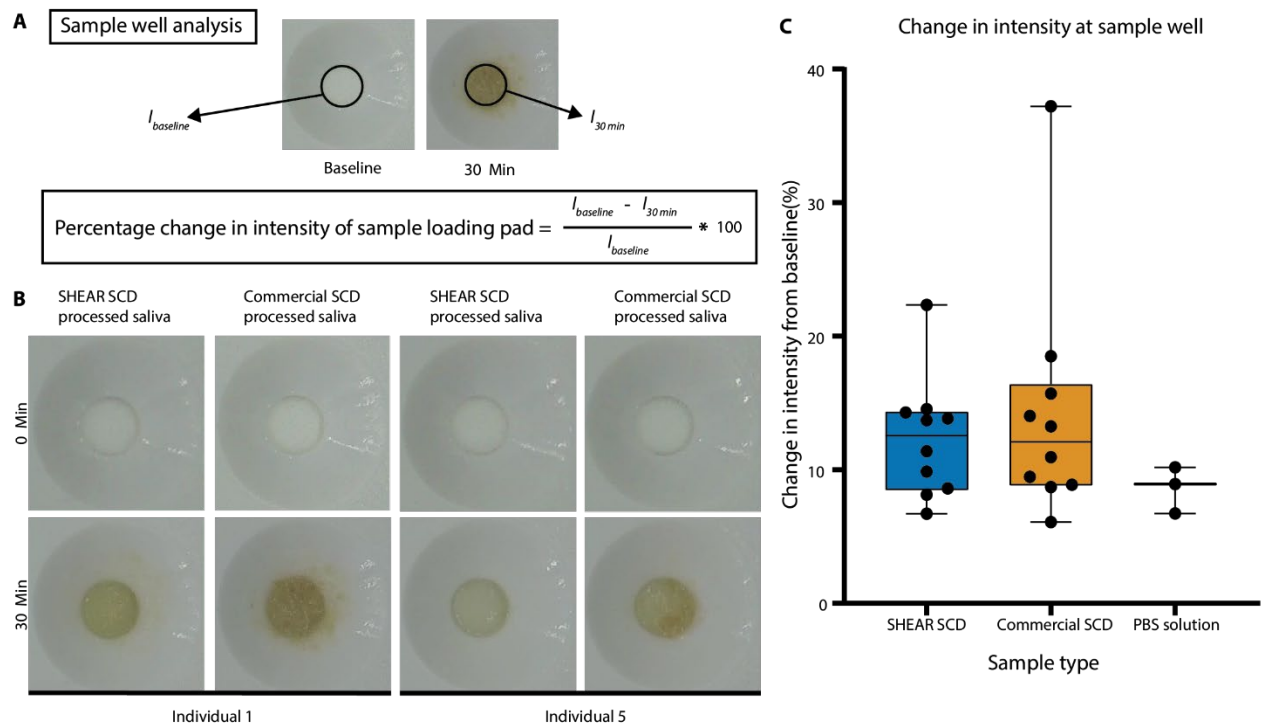

### FIG S1. Color intensity of sample well,

(A). Analysis method of percentage change in colour intensity of the sample well. (B). Photograph of sample well of individual 1 and 5 at minute 0 and minute 30, before and after loading of SHEAR SCD processed and commercial SCD processed saliva samples respectively. (C). Change in colour intensity of the sample well of SHEAR SCD processed saliva (N=10), commercial SCD processed saliva (N=10) and PBS solution (N=3). Whiskers represent maximum and minimum values, and the box represents median value, 25th and 75th percentile. No statistical difference detected with Wilcoxon signed-rank test at  $\alpha = 0.05$ .

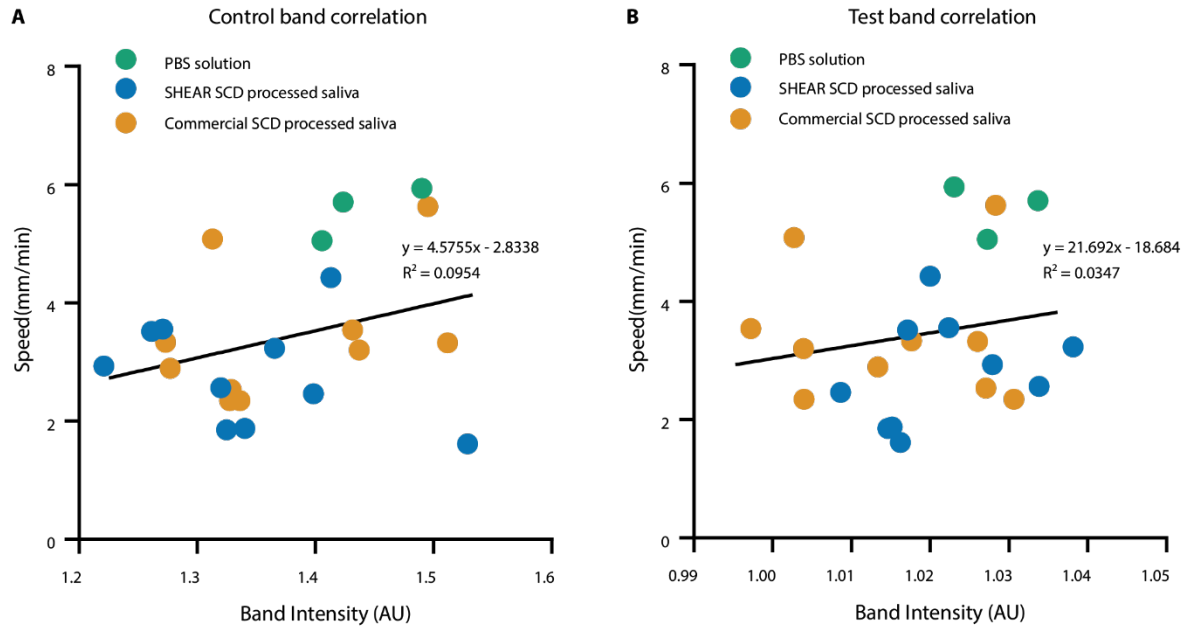

**FIG S2. Correlation between line intensity and liquid migration speed.**

Scatter plot with linear regression of liquid migration speed and intensity of (A) test line and (B) control line of SHEAR SCD processed saliva (N=10), commercial SCD processed saliva (N=10) and PBS solution (N=3).

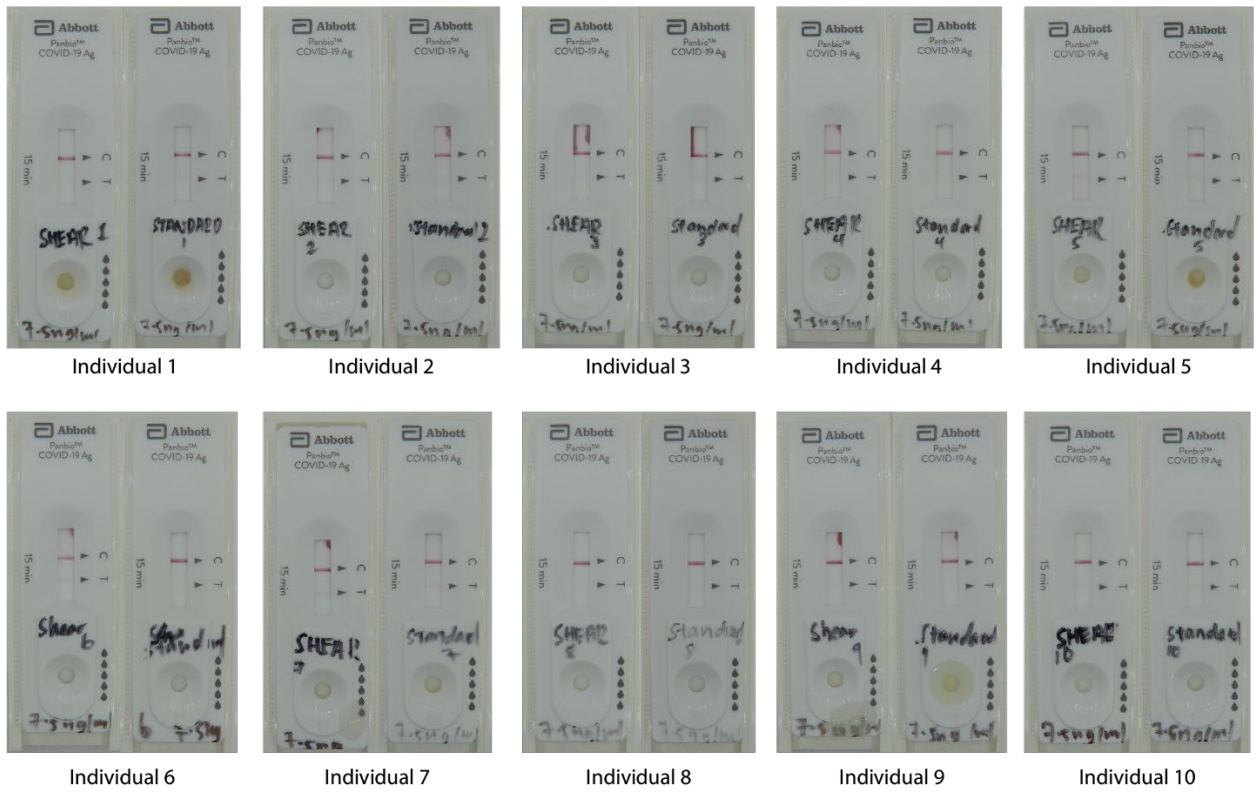

**FIG.S3. Photograph of rapid antigen test cassette used in the paired rapid antigen test.**

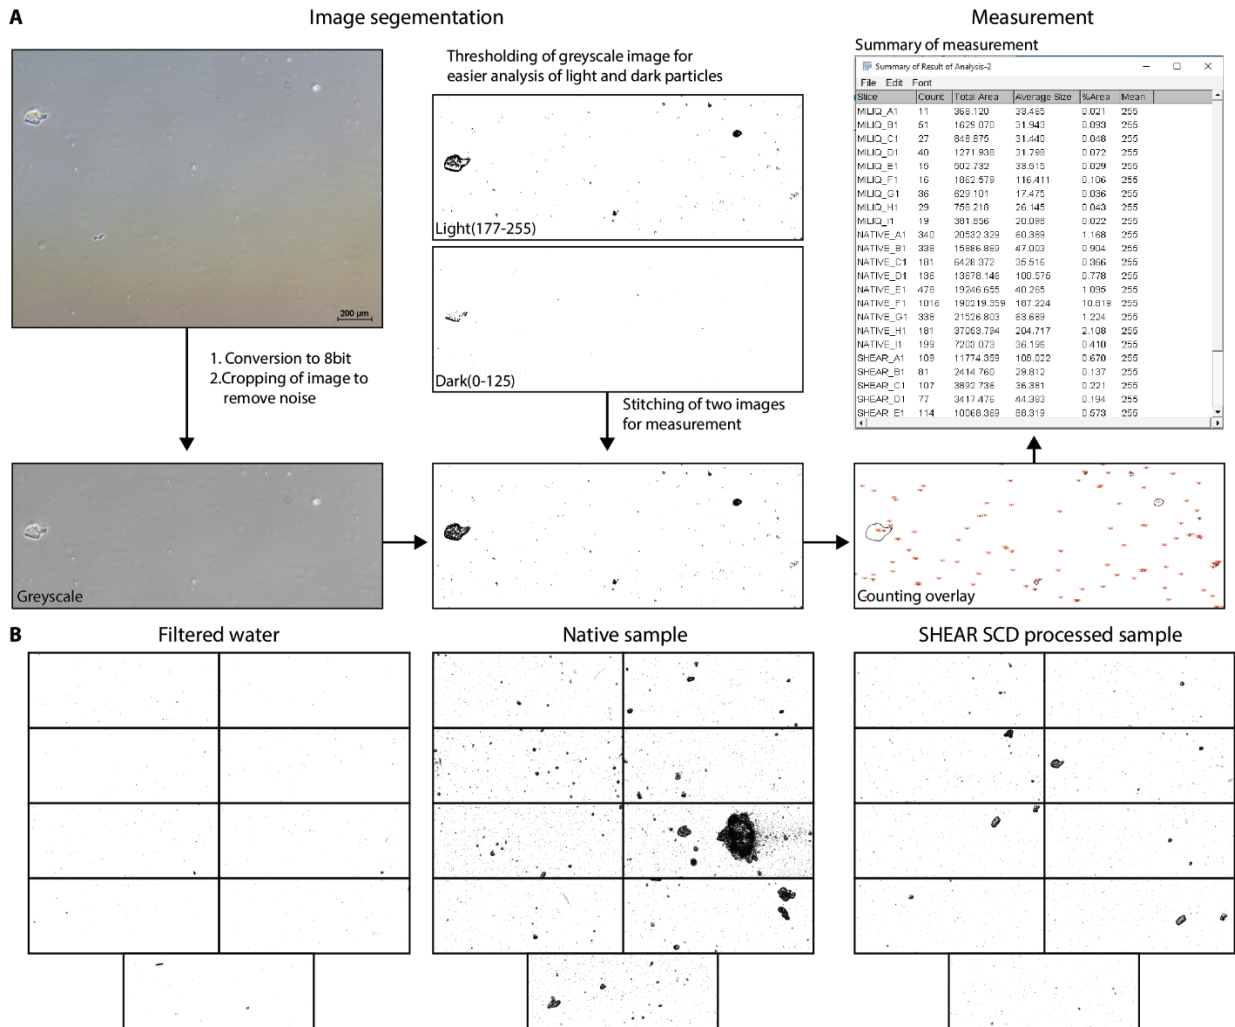

**FIG.S4. Processed image of for counting of food particle.**

(A). Method of image segmentation with ImageJ used for the measurement of area and count of food particles present in Filtered water, native sample and SHEAR SCD processed sample (N=9) (B). Processed images of Filtered water, native sample and SHEAR SCD processed sample

**Table S1. Example quotes of each focus area from the user study**

| <b>Focus area 1: Usability &amp; Functionality of the SHEAR SCD</b> |                                                                                |                                                                                                                                                                                                                                                                                                                |
|---------------------------------------------------------------------|--------------------------------------------------------------------------------|----------------------------------------------------------------------------------------------------------------------------------------------------------------------------------------------------------------------------------------------------------------------------------------------------------------|
|                                                                     | <b>Specifics</b>                                                               | <b>Example quote</b>                                                                                                                                                                                                                                                                                           |
| Positive                                                            | SHEAR device is straightforward and easy to use                                | “It was straightforward and it’s easy to use to... in terms of how it functions, it’s not hard to understand.” – Participant 6                                                                                                                                                                                 |
|                                                                     | Wide funnel allows for easy spitting process                                   | “Because there was a much larger surface area, [I] don’t have to worry about trying to fit my mouth into the funnel in order to contribute the saliva.” – Participant 5                                                                                                                                        |
|                                                                     | Wide funnel feels safer due to reduction in saliva spillage                    | “I think [the SHEAR device] is safer because you [spit] closer. You put your mouth closer and you open the flaps. Nothing is missing and going outside.” - Participant 2                                                                                                                                       |
|                                                                     | Process of squeezing and rolling is quick and easy                             | “It was really easy, because I thought the saliva wouldn’t go through but I just push it and it all went in one move. So, it was quite fast and efficient.” – Participant 7                                                                                                                                    |
|                                                                     | Process of squeezing and rolling allows for clearer indication of saliva level | “I thought that the rolling of the bag down to secrete the saliva down into the tube was quite interesting. I could see that after folding the bag and as I watch the saliva flow down, [I] could see the clear distinction between before being push and what’s after; there are less bubbles.” Participant 9 |
|                                                                     | SHEAR device easier to use for elderly                                         | “I find device 1 is better for those senior citizen because err, it can avoid spillage of the saliva” – Participant 12                                                                                                                                                                                         |
|                                                                     | Clear Instructions                                                             | “I think it is quite clear, once you go through the video, you are able to I mean know what to do with the device” Participant 14                                                                                                                                                                              |
| Negative                                                            | Commercial device more efficient and easier to use                             | “The [commercial] device is more straightforward because it is just like an opening and closing. You don’t really need to squeeze it out but I was thinking if it is because the [SHEAR] device [has] a filter or something.” – Participant 1                                                                  |
|                                                                     | Difficulty with flap during the rolling process                                | “When I was doing the folding down part [the process] was a bit hard, so I just force it down. It didn’t feel like there was a per... not perforation.” – Participant 7                                                                                                                                        |
|                                                                     | Difficulty fully opening funnel                                                | “When you pull [the funnel] open, the top will open but the bottom doesn’t open fully. So, the saliva gets stuck at somewhere in the middle where it open.” – Participant 4                                                                                                                                    |
|                                                                     | Uncertain about amount of saliva needed                                        | “It wasn’t very clear for me the extent to which [the saliva] was [dripping] down into the tube, so I didn’t know if I needed to add more saliva into the upper portion the funnel.” – Participant 6                                                                                                           |

|                                                                                             |                                                             |                                                                                                                                                                                |
|---------------------------------------------------------------------------------------------|-------------------------------------------------------------|--------------------------------------------------------------------------------------------------------------------------------------------------------------------------------|
|                                                                                             | Unsealed funnel before rolling process                      | “I had trouble sealing the bag. I don’t know if it’s the... it just didn’t seal, so I just folded it.” – Participant 7                                                         |
|                                                                                             | Backflow of saliva during the squeezing and rolling process | “The [SHEAR] device, there is a degree of backflow if you press too hard. I think there is too much air pressure inside the tube.” Participant 10                              |
|                                                                                             | People with disabilities might find SHEAR hard to use       | “Some people particularly those who maybe are, have disabilities, it [SHEAR] might be quite hard to use” Participant 11                                                        |
| <b>Focus area 2: Saliva as a biological material for diagnostic tests</b>                   |                                                             |                                                                                                                                                                                |
| Positive                                                                                    | Increased comfort level                                     | “It’s [saliva collection] more comfortable than the nasal swab because that hurts” Participant 4                                                                               |
|                                                                                             | Saliva collection is simple to use                          | “Saliva [collection] will be the easiest and the most convenient method “Participant 10                                                                                        |
|                                                                                             | Bleeding after swabbing                                     | “But then the PCR swab was just uncomfortable and then I bleed afterwards, after the nurse poke my nose. It was not a good experience” Participant 10                          |
|                                                                                             | Sneezing after nasal swab                                   | “I would say that it is very uncomfortable to do the nasal swab because I will just keep sneezing after that” Participant 7                                                    |
|                                                                                             | Prefers saliva collection over current collection methods   | “I would definitely choose the saliva collection for sure, for the convenience, not too sure about the cost, but definitely how less invasive it is” Participant 3             |
| Negative                                                                                    | Safety concerns for saliva collection method                | “But then the saliva is like you are putting... there is a risk of spillage, that’s probably where my concern is.” Participant 4                                               |
|                                                                                             | Prefer Cheek swab over saliva collection                    | “If I have a choice, I will rather do the cheek swab than do the saliva collection” Participant 7                                                                              |
|                                                                                             | Amount of saliva required for test                          | “I mean the only thing that I don’t like about these procedures [Saliva collection] is you have to get a lot of saliva out of your throat” Participant 2                       |
| <b>Focus area 3: User’s consideration for the adoption of diagnostic kit with SHEAR SCD</b> |                                                             |                                                                                                                                                                                |
| Device consideration                                                                        | Accuracy                                                    | “If it is not more accurate, it wouldn’t motivate me to use it. I would be like just give me any one [diagnostic kit] and I just use any one” Participant 7                    |
|                                                                                             | Cost                                                        | “Price point relative to the ART test kits, as long as it doesn’t stray too far, slightly expensive, I think it is worth the trade-off for being uncomfortable.” Participant 9 |
|                                                                                             | Safety                                                      | “So, I guess mainly safety and ... so that they are confident that it [diagnostic kit] will work and will be safe and will give a real result.” Participant 2                  |
|                                                                                             | Ease of use                                                 | “If I really have to choose between device [diagnostic kit], I care more about how easy it is to use, like how many steps” Participant 6                                       |
|                                                                                             | Hygiene                                                     | “I think the factors that would influence my... influence my preference to use this [diagnostic kit] would include things like hygiene” Participant 15                         |

|                          |                           |                                                                                                                                                                                                                                                           |
|--------------------------|---------------------------|-----------------------------------------------------------------------------------------------------------------------------------------------------------------------------------------------------------------------------------------------------------|
| Saliva test requirements | Amount of saliva required | “Depends on the amount of saliva required. Saliva is preferred over swab test if no more than 1ml is required” Participant 11                                                                                                                             |
|                          | Pre-testing requirements  | “Then, I will probably have to figure out, like actually plan in advance when I want to take the [saliva] test because it also includes even if I take a small snack, ... I can’t eat a small snack or brush my teeth, so when can I do it” Participant 5 |
